# Supplementary material
Source: PubMed Central journal article supplement (PMC4936553)
Supplement: supp_pp.16.00220_PP2016-00220DR1_Supplemental_TablesS2.pdf [file supp_pp.16.00220_PP2016-00220DR1_Supplemental_TablesS2.pdf]

Supplemental Table S2. Summary of differentially expressed genes discovered by RNA-seq

WT(*ZmOXS2b*) VS WT

| DEG Number | GeneID    | Stress or metal ion transport related genes | Log <sub>2</sub> Ratio WT ( <i>ZmOXS2b</i> ) VS WT | Fold Change WT ( <i>ZmOXS2b</i> ) VS WT | KEGG Orthology                                                   | GO Component                     | GO Function                                  | GO Process                                                                                                                                                                                      | Results of blast against nr database            | TAIR Annotation (Key Words)                                                                 |
|------------|-----------|---------------------------------------------|----------------------------------------------------|-----------------------------------------|------------------------------------------------------------------|----------------------------------|----------------------------------------------|-------------------------------------------------------------------------------------------------------------------------------------------------------------------------------------------------|-------------------------------------------------|---------------------------------------------------------------------------------------------|
|            | AT4G23670 | √                                           | 0.77                                               | 1.71                                    | -                                                                | GO:0044444//<br>cytoplasmic part | GO:0046914//<br>transition metal ion binding | GO:0006952//<br>defense response;<br>GO:0006970//<br>response to osmotic stress;<br>GO:0003006//<br>developmental process<br>involved in reproduction;<br>GO:0010038//<br>response to metal ion | SRPBCC ligand-binding domain-containing protein | Involved in defense response, defense response to bacterium, fruit, response to cadmium ion |
| DEG18      | AT5G26220 | √                                           | 1.45                                               | 2.73                                    | K07232 1 2e-51 200 osa:<br>4335982 cation transport protein ChaC | -                                | -                                            | GO:0010038//<br>response to metal ion                                                                                                                                                           | ChaC-like family protein                        | response to cadmium ion, response to lead ion                                               |

---

AT2G38390

√

2.44

5.43

K00430|1|0.0|705|ath:AT2G38390|peroxidase [EC:1.11.1.7]

GO:0005618//  
cell wall;  
GO:0043231//  
intracellular  
membrane-bound  
organelle;GO:0031090//  
organelle  
membrane;  
GO:0005576//  
extracellular region

GO:0016209//  
antioxidant  
activity;GO:0003824  
//  
catalytic activity;  
GO:0005506//  
iron ion binding

GO:0009314//  
response to  
radiation;GO:0006952//  
defense  
response;GO:0010038//  
response to metal  
ion;GO:0000902//  
cell morphogenesis;  
GO:0006970//  
response to osmotic  
stress;GO:0042743//  
hydrogen peroxide  
metabolic process

peroxidase 23

oxidation-reduction  
process, peroxidase  
activity, response to  
oxidative stress

---

AT5G20250

√

-0.89

0.54

K06617|1|0.0|1504|ath:AT5G20250|raffinose synthase  
[EC:2.4.1.82]

GO:0009536//  
plastid;  
GO:0009536//  
plastid;  
GO:0009536//  
plastid;  
GO:0009536//  
plastid

GO:0008378//  
Galactosyltransferase activity;  
GO:0008378//  
galactosyltransferase activity;  
GO:0008378//  
galactosyltransferase activity;  
GO:0008378//  
galactosyltransferase activity

GO:0006950//  
response to stress;  
GO:0009628//  
response to abiotic stimulus;GO:0006950//  
response to stress;  
GO:0009628//response to abiotic stimulus;  
GO:0006950//  
response to stress;  
GO:0009628//  
response to abiotic stimulus;GO:0006950//response to stress;  
GO:0009628//  
response to abiotic stimulus

F5O24\_140

response to oxidative stress

---

AT2G28630

-0.95

0.52

K15397|1|1e-98|358|aly:ARALY  
DRAFT\_887345|3-ketoacyl-CoA  
synthase [EC:2.3.1.-]

GO:0043231//  
intracellular  
membrane-bounded  
organelle

GO:0016747//  
transferase activity,  
transferring acyl  
groups other than  
amino-acyl groups

GO:0009314//  
response  
to radiation;GO:0006950//  
response to  
stress;GO:0006631//  
fatty acid metabolic  
process

3-ketoacyl-CoA  
synthase 12

AT1G55020

√

0.94

1.91

K15718|1|0.0|1650|ath:AT1G55  
020|linoleate 9S-lipoxygenase  
[EC:1.13.11.58]

-

GO:0046914//transit  
ion metal ion  
binding;GO:001670  
2//oxidoreductase  
activity, acting on  
single donors with  
incorporation of  
molecular oxygen,  
incorporation of two  
atoms of oxygen

GO:0006633//  
fatty acid biosynthetic  
process;GO:0009694//  
jasmonic acid metabolic  
process;GO:0009725//  
response to hormone  
stimulus;GO:0042742//  
defense response to  
bacterium;GO:0016044//  
cellular membrane  
organization;  
GO:0048527//lateral root  
development

lipoxygenase 1

defense response, lipid  
oxidation

---

|       |           |   |       |      |                                                                                                                               |                              |                                                             |                                                                                              |                                                                                     |
|-------|-----------|---|-------|------|-------------------------------------------------------------------------------------------------------------------------------|------------------------------|-------------------------------------------------------------|----------------------------------------------------------------------------------------------|-------------------------------------------------------------------------------------|
| DEG5  | AT3G49570 |   | 1.06  | 2.09 | -                                                                                                                             | -                            | -                                                           | -                                                                                            | response to low sulfur 3 protein                                                    |
| DEG1  | AT1G75280 | √ | 1.15  | 2.22 | K00224 1 5e-173 605 ath:AT1G75280 [EC:1.3.1.-];K13081 4 1e-64 245 pop:POPTR_835080 leucoanthocyanidin reductase [EC:1.17.1.3] | GO:0016020//membrane         | GO:0016491//oxidoreductase activity                         | GO:0006950//response to stress;GO:0010038//response to metal ion                             | Isoflavone reductase-P3<br>Involved in response to oxidative stress.                |
|       | AT3G16670 | √ | -0.83 | 0.56 | -                                                                                                                             | GO:0044464//cell part        | -                                                           | GO:0006950//response to stress                                                               | Pollen Ole e 1 allergen and extensin family protein<br>response to oxidative stress |
|       | AT1G70850 | √ | 0.88  | 1.84 | -                                                                                                                             | -                            | GO:0005488//binding;GO:0005488//binding                     | GO:0006950//response to stress;GO:0006950//response to stress;GO:0006950//response to stress | MLP-like protein 34<br>response to biotic stimulus, defense response                |
| DEG13 | AT3G19710 |   | 1.44  | 2.72 | K00826 1 0.0 684 ath:AT3G19710 branched-chain amino acid aminotransferase [EC:2.6.1.42]                                       | GO:0044444//cytoplasmic part | GO:0004084//branched-chain-amino-acid transaminase activity | GO:0019758;GO:0006520//cellular amino acid metabolic process                                 | Probable branched-chain-amino-acid aminotransferase 4                               |

|      |           |   |      |      |                                                                                            |                                                       |                                                                                                |                                                                                                                             |                                |                                                                |
|------|-----------|---|------|------|--------------------------------------------------------------------------------------------|-------------------------------------------------------|------------------------------------------------------------------------------------------------|-----------------------------------------------------------------------------------------------------------------------------|--------------------------------|----------------------------------------------------------------|
| DEG7 | AT5G26260 |   | 1.23 | 2.35 | K11838 1 1e-16 85.9 rcu:RCOM_0423090 ubiquitin carboxyl-terminal hydrolase 7 [EC:3.1.2.15] | GO:0031224//intrinsic to membrane;GO:0009536//plastid | -                                                                                              | -                                                                                                                           | TRAF-like family protein       |                                                                |
|      | AT2G01520 | √ | 1.46 | 2.75 | -                                                                                          | GO:0044444//cytoplasmic part                          | GO:0046914//transition metal ion binding                                                       | GO:0006950//response to stress;GO:0003006//developmental process involved in reproduction;GO:0010038//response to metal ion | MLP-like protein 328           | Involved in defense response                                   |
| DEG6 | AT4G04610 | √ | 1.08 | 2.12 | K05907 1 0.0 861 ath:AT4G04610 adenylyl-sulfate reductase (glutathione) [EC:1.8.4.9]       | GO:0031976;GO:009532//plastid stroma                  | GO:0016671//oxidoreductase activity, acting on a sulfur group of donors, disulfide as acceptor | GO:0006790//sulfur compound metabolic process;GO:0019725//cellular homeostasis                                              | 5'-adenylylsulfate reductase 1 | acting on oxidation-reduction process, oxidoreductase activity |

AT5G48010

1.25

2.37

K15821|1|0.0|1587|ath:AT5G48010|thalianol synthase [EC:5.4.99.31];K15823|3|0.0|1290|ath:AT4G15340|arabidiol synthase [EC:4.2.1.124];K15813|4|0.0|971|pop:POPTR\_764959|beta-amyrin synthase [EC:5.4.99.39]

GO:0031090//organelle membrane;GO:0009526//plastid envelope;GO:0031090//organelle membrane;GO:0009526//plastid envelope

GO:0015893//drug transport;GO:0050832//defense response to fungus;GO:0006796//phosphate-containing compound metabolic process;GO:0010683;GO:0048513//organ development;GO:0016104//triterpenoid biosynthetic process;GO:0071365//cellular response to auxin stimulus;GO:0009814//defense response, incompatible interaction;GO:0006464//cellular protein modification process;GO:0019762//glucosinolate catabolic process;GO:0010685;GO:0000041//transition metal ion transport

thalianol synthase 1

|       |           |   |       |      |   |                                                                                                                                              |                                                    |                                                                                                    |                                                                                                                                                       |                              |
|-------|-----------|---|-------|------|---|----------------------------------------------------------------------------------------------------------------------------------------------|----------------------------------------------------|----------------------------------------------------------------------------------------------------|-------------------------------------------------------------------------------------------------------------------------------------------------------|------------------------------|
|       | AT3G22240 |   | 0.81  | 1.75 | - | GO:0016020//membrane                                                                                                                         | -                                                  | GO:0051707//response to other organism                                                             | uncharacterized protein                                                                                                                               |                              |
|       | AT5G43580 | √ | -1.24 | 0.42 | - | -                                                                                                                                            | GO:0004866//endopeptidase inhibitor activity       | GO:0006950//response to stress                                                                     | Serine protease inhibitor, potato inhibitor I-type family protein                                                                                     | Involved in defense response |
| DEG14 | AT3G08860 |   | 1.36  | 2.57 |   | K00827 1 0.0 958 ath:AT3G08860 alanine-glyoxylate transaminase / (R)-3-amino-2-methylpropionate-pyruvate transaminase [EC:2.6.1.44 2.6.1.40] | GO:0043231//intracellular membrane-bound organelle | GO:0008483//transaminase activity;GO:0048037//cofactor binding                                     | GO:0031669//cellular response to nutrient levels                                                                                                      | PYRIMIDINE 4                 |
| DEG3  | AT2G39310 |   | 1.06  | 2.08 | - | GO:0009536//plastid;GO:0009536//plastid                                                                                                      | GO:0009536//plastid;GO:0009536//plastid            | GO:0030246//carbohydrate binding;GO:0030246//carbohydrate binding;GO:0030246//carbohydrate binding | GO:0009719;GO:0006970//response to osmotic stress;GO:0009719;GO:0006970//response to osmotic stress;GO:0009719;GO:0006970//response to osmotic stress | jacalin-related lectin 22    |
|       | AT3G05730 |   | -0.79 | 0.58 | - | -                                                                                                                                            | -                                                  | -                                                                                                  | defensin-like protein 205                                                                                                                             |                              |



|       |           |       |      |                                                                                                                                                       |                                                                   |                                                                   |                                                                               |                                       |
|-------|-----------|-------|------|-------------------------------------------------------------------------------------------------------------------------------------------------------|-------------------------------------------------------------------|-------------------------------------------------------------------|-------------------------------------------------------------------------------|---------------------------------------|
|       | AT5G37690 | 1.72  | 3.29 | K00514 1 2e-23 108 rcu:RCOM_1428040 zeta-carotene desaturase [EC:1.3.5.6];K01206 2 2e-19 95.5 aly:ARALYDRAFT_475890 alp ha-L-fucosidase [EC:3.2.1.51] | GO:0031410// cytoplasmic vesicle                                  | GO:0016788// hydrolase activity, acting on ester bonds            | GO:0044238// primary metabolic process                                        | lipase                                |
| DEG28 | ATCG00800 | -1.41 | 0.38 | K02982 1 3e-113 405 ath:ArthCp061 small subunit ribosomal protein S3                                                                                  | GO:000314//organelle small ribosomal subunit;GO:0009536// plastid | GO:0003723// RNA binding;GO:0005198//structural molecule activity | GO:0010467// gene expression                                                  | ribosomal protein S3                  |
|       | ATCG00550 | -4.03 | 0.06 | -                                                                                                                                                     | GO:0009536// plastid                                              | -                                                                 | -                                                                             | unnamed protein product (chloroplast) |
|       | AT3G59220 | 1.13  | 2.19 | K06911 1 6e-123 438 aly:ARALYDRAFT_670248                                                                                                             | GO:0016020// membrane                                             | GO:0005515//protein binding                                       | GO:0009725// response to hormone stimulus;GO:0009637// response to blue light | pirin                                 |

|           |   |      |      |                                                                                |                                                                                                                                                                                                                                                                                        |                                                                                                                                                                                                                                                                                                                                            |                                                                                                                                                                                                                                                                                                                                                                        |                                                                                               |                                                    |                                                                  |
|-----------|---|------|------|--------------------------------------------------------------------------------|----------------------------------------------------------------------------------------------------------------------------------------------------------------------------------------------------------------------------------------------------------------------------------------|--------------------------------------------------------------------------------------------------------------------------------------------------------------------------------------------------------------------------------------------------------------------------------------------------------------------------------------------|------------------------------------------------------------------------------------------------------------------------------------------------------------------------------------------------------------------------------------------------------------------------------------------------------------------------------------------------------------------------|-----------------------------------------------------------------------------------------------|----------------------------------------------------|------------------------------------------------------------------|
| AT2G21100 | √ | 2.07 | 4.19 | -                                                                              |                                                                                                                                                                                                                                                                                        | GO:0044464//<br>cell part                                                                                                                                                                                                                                                                                                                  | -                                                                                                                                                                                                                                                                                                                                                                      | GO:0006950//<br>response to<br>stress;GO:0009699//<br>phenylpropanoid<br>biosynthetic process | putative disease<br>resistance response<br>protein | Involved in lignan<br>biosynthetic process,<br>defense response; |
| AT1G11840 | √ | 0.81 | 1.76 | K01759 1 5e-162 569 ath:AT1G<br>11840 lactoylglutathione lyase<br>[EC:4.4.1.5] | envelope;GO:0016<br>020//membrane;G<br>O:0042579//microb<br>ody;GO:0009526//p<br>lastid<br>envelope;GO:0016<br>020//membrane;G<br>O:0042579//microb<br>ody;GO:0009526//p<br>lastid<br>envelope;GO:0016<br>020//membrane;G<br>O:0042579//microb<br>ody;GO:0009526//p<br>lastid envelope | GO:0009526//<br>binding;<br>GO:0016846//carbo<br>n-sulfur lyase<br>activity;<br>GO:0043169//<br>cation<br>binding;GO:001684<br>6//carbon-sulfur<br>lyase activity;<br>GO:0043169//cation<br>binding;GO:001684<br>6//<br>carbon-sulfur lyase<br>activity;<br>GO:0043169//cation<br>binding;GO:001684<br>6//carbon-sulfur<br>lyase activity\ | GO:0043169//cation<br>GO:0044238//primary<br>metabolic<br>process;GO:0010038//re<br>sponse to metal<br>ion;GO:0044238//primary<br>metabolic<br>process;GO:0010038//re<br>sponse to metal<br>ion;GO:0044238//primary<br>metabolic<br>process;GO:0010038//re<br>sponse to metal<br>ion;GO:0044238//primary<br>metabolic<br>process;GO:0010038//re<br>sponse to metal ion | lactoylglutathione<br>lyase-like protein                                                      | response to cadmium ion                            |                                                                  |

|       |           |   |       |      |   |                                               |                                                                                                         |                                                                                                      |                                                                                                                                    |                                             |                                                                 |
|-------|-----------|---|-------|------|---|-----------------------------------------------|---------------------------------------------------------------------------------------------------------|------------------------------------------------------------------------------------------------------|------------------------------------------------------------------------------------------------------------------------------------|---------------------------------------------|-----------------------------------------------------------------|
|       | AT4G12490 | √ | -1.05 | 0.48 | - |                                               | GO:0031410//<br>cytoplasmic vesicle                                                                     | GO:0005488//bindin<br>g                                                                              | GO:0010876;<br>GO:0009814//<br>defense response,<br>incompatible interaction                                                       | seed storage 2S<br>albumin-like protein     | defense response to<br>fungus                                   |
|       | AT1G70890 | √ | 0.81  | 1.75 | - |                                               | GO:0009536//<br>plastid                                                                                 | GO:0005488//bindin<br>g                                                                              | GO:0006950//<br>response to stress                                                                                                 | MLP-like protein 43                         | Involved in response to<br>biotic stimulus, defense<br>response |
|       | AT5G10230 |   | -1.94 | 0.26 | - |                                               | -                                                                                                       | -                                                                                                    | -                                                                                                                                  | -                                           |                                                                 |
|       | AT2G18370 |   | 1.21  | 2.32 | - |                                               | GO:0043231//<br>intracellular<br>membrane-bounde<br>d<br>organelle;GO:0044<br>444//<br>cytoplasmic part | GO:0046872//metal<br>ion<br>binding;GO:000554<br>3//phospholipid<br>binding                          | GO:0006970//<br>response to osmotic<br>stress;GO:0008643//<br>carbohydrate<br>transport;GO:0009416//<br>response to light stimulus | annexin D7                                  |                                                                 |
|       | AT1G18100 |   | 2.00  | 3.99 |   | K06910 1 5e-06 50.8 smo:SELM<br>ODRAFT_143762 | GO:0044464//<br>cell part                                                                               | GO:0016787//<br>hydrolase<br>activity;GO:0005488<br>/<br>/binding                                    | GO:0051234//<br>establishment of<br>localization;GO:0010876                                                                        | non-specific<br>lipid-transfer protein<br>8 |                                                                 |
| DEG22 | AT1G18100 |   | 2.00  | 3.99 |   | K06910 1 5e-06 50.8 smo:SELM<br>ODRAFT_143762 | GO:0043231//<br>intracellular<br>membrane-bounde<br>d organelle                                         | GO:0016788//<br>hydrolase activity,<br>acting on ester<br>bonds;GO:0003676/<br>/nucleic acid binding | GO:0006259//<br>DNA metabolic<br>process;GO:0009725//<br>response to hormone<br>stimulus;GO:0009845//se<br>ed germination          | protein MOTHER of<br>FT and TF 1            |                                                                 |

|       |           |   |       |      |                                                                                                                                                                                                                                                                                                                                                                                                                                                         |                                                                                                                                          |                                                                                                                              |                                                                                                          |                                   |                                                      |
|-------|-----------|---|-------|------|---------------------------------------------------------------------------------------------------------------------------------------------------------------------------------------------------------------------------------------------------------------------------------------------------------------------------------------------------------------------------------------------------------------------------------------------------------|------------------------------------------------------------------------------------------------------------------------------------------|------------------------------------------------------------------------------------------------------------------------------|----------------------------------------------------------------------------------------------------------|-----------------------------------|------------------------------------------------------|
| DEG10 | AT1G16410 | √ | 1.53  | 2.90 | K12154[1 0.0 1058]ath:AT1G16410 cytochrome P450, family 79, subfamily F, polypeptide 1<br>[EC:1.14.13.-];K12155[3 0.0 935]ath:AT1G16400 cytochrome P450, family 79, subfamily F, polypeptide 2<br>[EC:1.14.13.-];K13027[4 4e-115]414[ sbi:SORBI_01g001200 tyrosine N-monooxygenase<br>[EC:1.14.13.41];K11812[5 3e-110 397]aly:ARALYDRAFT_490780 cytochrome P450, family 79, subfamily B, polypeptide 2 (tryptophan N-monooxygenase)<br>[EC:1.14.13.125] | GO:0004497//<br>GO:0043231//<br>intracellular<br>membrane-bound<br>d organelle;<br>GO:0043231//intracellular<br>membrane-bound organelle | GO:0005506<br>//<br>iron ion<br>binding;GO:0004497//monooxygenase activity;<br>GO:0005506//<br>iron ion binding              | GO:0019758;<br>GO:0019758                                                                                | dihomomethionine<br>N-hydroxylase | oxidoreductase activity                              |
|       | ATCG01110 | √ | -0.88 | 0.54 | K05579[1 0.0 778]ath:ArthCp080 NAD(P)H-quinone oxidoreductase subunit H<br>[EC:1.6.5.3]                                                                                                                                                                                                                                                                                                                                                                 | GO:0009534//<br>chloroplast<br>thylakoid                                                                                                 | GO:0016651//<br>oxidoreductase activity, acting on NADH or NADPH;GO:0048037//cofactor binding;GO:0000166//nucleotide binding | GO:0051234//<br>establishment of localization;GO:0006091//generation of precursor metabolites and energy | NADH<br>dehydrogenase subunit 7   | oxidation-reduction process, oxidoreductase activity |



|       |           |   |       |      |                                                                                                                                        |                                                                            |                                                                                                                                                                                                                                                                                              |                                                  |                                                                                        |
|-------|-----------|---|-------|------|----------------------------------------------------------------------------------------------------------------------------------------|----------------------------------------------------------------------------|----------------------------------------------------------------------------------------------------------------------------------------------------------------------------------------------------------------------------------------------------------------------------------------------|--------------------------------------------------|----------------------------------------------------------------------------------------|
| DEG30 | AT5G39110 |   | -1.03 | 0.49 | -                                                                                                                                      | GO:0044421//<br>extracellular region<br>part;<br>GO:0044464//<br>cell part | GO:0046914//<br>transition metal ion<br>binding;<br>GO:0016623;<br>GO:0048037//<br>cofactor binding                                                                                                                                                                                          | GO:0006005//<br>L-fucose biosynthetic<br>process | germin-like protein<br>subfamily 1 member<br>14                                        |
|       | AT5G58860 | √ | 1.09  | 2.13 | K15401 1 0.0 1041 ath:AT5G58860 cytochrome P450, family 86, subfamily A, polypeptide 1 (fatty acid omega-hydroxylase)<br>[EC:1.14.-.-] | GO:0043231//<br>intracellular<br>membrane-bound organelle                  | GO:0005506//<br>iron ion<br>binding;GO:0016713;<br>GO:0016712//<br>oxidoreductase<br>activity, acting on<br>paired donors, with<br>incorporation or<br>reduction of<br>molecular oxygen,<br>reduced flavin or<br>flavoprotein as one<br>donor, and<br>incorporation of one<br>atom of oxygen | GO:0006631//<br>fatty acid metabolic<br>process  | cytochrome P450<br>86A1<br>oxidation-reduction<br>process, oxidoreductase<br>activity, |

AT4G19690

√

-0.99

0.50

K14709|1|2e-149|527|aly:ARAL  
YDRAFT\_330887|solute carrier  
family 39 (zinc transporter),  
member 1/2/3

GO:0031224//  
intrinsic to  
membrane;  
GO:0031224//  
intrinsic to  
membrane

GO:0005375//copper ion  
transmembrane  
transporter  
activity;GO:0016491  
//oxidoreductase  
activity;GO:0005375  
//copper ion  
transmembrane  
transporter activity

GO:0051707//  
response to other  
organism;GO:0006829//  
zinc ion  
transport;GO:0010039//  
response to iron  
ion;GO:0006875//  
cellular metal ion  
homeostasis;  
GO:0006826//  
iron ion  
transport;GO:0071241//  
cellular response to  
inorganic substance;  
GO:0009723//  
response to ethylene  
stimulus;GO:0051707//  
response to other  
organism;GO:0006829//  
zinc ion  
transport;GO:0010039//  
response to iron  
ion;GO:0006875//  
cellular metal ion  
homeostasis;GO:0006826//  
iron ion transport

Fe(2+) transport  
protein 1

cadmium ion  
transmembrane  
transporter activity,  
cadmium ion transport





|       |           |   |       |      |                                                                                  |                                                                                                  |                                                                                                                               |                                                                                                                                                                  |                                                                  |                                                                    |
|-------|-----------|---|-------|------|----------------------------------------------------------------------------------|--------------------------------------------------------------------------------------------------|-------------------------------------------------------------------------------------------------------------------------------|------------------------------------------------------------------------------------------------------------------------------------------------------------------|------------------------------------------------------------------|--------------------------------------------------------------------|
| DEG23 | AT5G37990 | √ | 2.23  | 4.69 | K08241 1 1e-44 179 rcu:RCOM_1595240 jasmonate O-methyltransferase [EC:2.1.1.141] | GO:0044464//<br>cell part                                                                        | GO:0008171//<br>O-methyltransferase activity                                                                                  | GO:0006730//<br>one-carbon metabolic process                                                                                                                     | S-adenosyl-L-methionine-dependent methyltransferase-like protein | transition metal ion transport                                     |
|       | ATCG00820 |   | -1.25 | 0.42 | K02965 1 4e-48 187 ath:ArthCp063 small subunit ribosomal protein S19             | GO:000314//<br>organellar small ribosomal subunit; GO:0009532//<br>plastid stroma                | GO:0003723//<br>RNA binding; GO:0005198//<br>structural molecule activity                                                     | GO:0010467//<br>gene expression                                                                                                                                  | ribosomal protein S19                                            |                                                                    |
| DEG2  | AT1G78370 | √ | 1.13  | 2.18 | K00799 1 1e-73 274 gmx:547936 glutathione S-transferase [EC:2.5.1.18]            | GO:0009532//plastid<br>stroma;GO:0031090//organelle<br>membrane;GO:0005576//extracellular region | GO:0042277//<br>peptide binding; GO:0016765//<br>transferase activity, transferring alkyl or aryl (other than methyl) groups; | GO:0010038//<br>response to metal ion;GO:0009414//response to water deprivation;GO:0009404//toxin metabolic process;GO:0009639//response to red or far red light | glutathione S-transferase TAU20                                  | Encodes glutathione transferase belonging to the tau class of GSTs |
|       | AT3G53980 |   | -0.95 | 0.52 | -                                                                                | GO:0044464//<br>cell part; GO:0044464//<br>cell part                                             | GO:0005488//<br>binding;GO:0016787//hydrolase activity binding                                                                | GO:0010876;<br>GO:0010876                                                                                                                                        | seed storage 2S albumin-like protein                             |                                                                    |

---

|       |           |   |       |      |                                                     |                          |                                                                                                        |                                     |                                                              |                                               |
|-------|-----------|---|-------|------|-----------------------------------------------------|--------------------------|--------------------------------------------------------------------------------------------------------|-------------------------------------|--------------------------------------------------------------|-----------------------------------------------|
|       | AT5G23220 |   | 1.24  | 2.35 | -                                                   | -                        |                                                                                                        | GO:0016811//<br>hydrolase activity  | GO:0046496//<br>nicotinamide nucleotide<br>metabolic process | nicotinamidase 3                              |
|       | AT1G76960 |   | 0.91  | 1.88 | -                                                   | -                        | -                                                                                                      | -                                   | -                                                            | -                                             |
| DEG26 | AT5G18600 | √ | -1.20 | 0.43 | K03676 1 4e-23 106 bdi:100821<br>530 glutaredoxin 3 | GO:0044464//cell<br>part | GO:0030611//arsen<br>ate reductase<br>activity;GO:0015036<br>//disulfide<br>oxidoreductase<br>activity | GO:0019725//cellular<br>homeostasis | monothiol<br>glutaredoxin-S2                                 | arsenate reductase<br>(glutaredoxin) activity |

---

DEG24

AT5G48000

√

1.93

3.81

K00030|1|3e-79|294|vvi:100242  
228|isocitrate dehydrogenase  
(NAD+)  
[EC:1.1.1.41];K09587|2|8e-66|2  
49|sbi:SORBI\_01g041900|cytochrome  
P450, family 90, subfamily B, polypeptide 1  
(steroid 22-alpha-hydroxylase)  
[EC:1.14.13.-];K09588|3|2e-65|2  
48|gmx:100775886|cytochrome  
P450, family 90, subfamily A,  
polypeptide 1 [EC:1.14.-.-]

GO:004497//mono  
oxygenase activity;  
GO:0005506//iron  
intracellular  
ion binding;  
membrane-bound organelle;  
GO:004497//mono  
oxygenase activity;  
GO:0005506//  
GO:0010683;GO:004851  
3//organ  
development;GO:001068  
3;GO:0048513//organ  
development;GO:001068  
3;GO:0048513//organ  
development;GO:001068  
3;GO:0048513//organ  
development  
GO:0005506//  
iron ion binding;  
GO:004497//  
monooxygenase  
activity;  
GO:0005506//iron  
ion binding;  
GO:004497//  
monooxygenase  
activity;  
GO:0005506//iron  
ion binding

cytochrome P450  
708A2

oxidation-reduction  
process, oxidoreductase  
activity

|           |  |      |      |                                                                                                                                                                |                                                      |                                                                                                                                      |                                                                                                                                                                                                          |      |                                             |
|-----------|--|------|------|----------------------------------------------------------------------------------------------------------------------------------------------------------------|------------------------------------------------------|--------------------------------------------------------------------------------------------------------------------------------------|----------------------------------------------------------------------------------------------------------------------------------------------------------------------------------------------------------|------|---------------------------------------------|
| AT1G19570 |  | 0.77 | 1.70 | K01873 1 2e-57 221 aly:ARALY DRAFT_326110 valyl-tRNA synthetase [EC:6.1.1.9];K00799 2 3e-13 73.9 cre:CHLREDRAFT_146799 glutathione S-transferase [EC:2.5.1.18] | GO:0043231//intracellular membrane-bounded organelle | GO:0015038//glutathione disulfide oxidoreductase activity;GO:0042277//microbody;GO:005576//extracellular region;GO:0016020//membrane | GO:0010038//response to metal ion;GO:0009719;GO:0009608//response to symbiont;GO:0043900//regulation of multi-organism process;GO:0006464//cellular protein modification glutathione S-transferase DHAR1 |      |                                             |
|           |  |      |      |                                                                                                                                                                | GO:0043231//intracellular membrane-bounded organelle | GO:0015038//glutathione disulfide oxidoreductase activity;GO:0042277//microbody;GO:005576//extracellular region;GO:0016020//membrane | GO:0010038//response to metal ion;GO:0009719;GO:0009608//response to symbiont;GO:0043900//regulation of multi-organism process;GO:0006464//cellular protein modification glutathione S-transferase DHAR1 |      |                                             |
|           |  |      |      |                                                                                                                                                                | GO:0043231//intracellular membrane-bounded organelle | GO:0015038//glutathione disulfide oxidoreductase activity;GO:0042277//microbody;GO:005576//extracellular region;GO:0016020//membrane | GO:0010038//response to metal ion;GO:0009719;GO:0009608//response to symbiont;GO:0043900//regulation of multi-organism process;GO:0006464//cellular protein modification glutathione S-transferase DHAR1 |      |                                             |
|           |  |      |      |                                                                                                                                                                | GO:0043231//intracellular membrane-bounded organelle | GO:0015038//glutathione disulfide oxidoreductase activity;GO:0042277//microbody;GO:005576//extracellular region;GO:0016020//membrane | GO:0010038//response to metal ion;GO:0009719;GO:0009608//response to symbiont;GO:0043900//regulation of multi-organism process;GO:0006464//cellular protein modification glutathione S-transferase DHAR1 |      |                                             |
|           |  |      |      |                                                                                                                                                                | GO:0043231//intracellular membrane-bounded organelle | GO:0015038//glutathione disulfide oxidoreductase activity;GO:0042277//microbody;GO:005576//extracellular region;GO:0016020//membrane | GO:0010038//response to metal ion;GO:0009719;GO:0009608//response to symbiont;GO:0043900//regulation of multi-organism process;GO:0006464//cellular protein modification glutathione S-transferase DHAR1 |      |                                             |
|           |  |      |      |                                                                                                                                                                | GO:0043231//intracellular membrane-bounded organelle | GO:0015038//glutathione disulfide oxidoreductase activity;GO:0042277//microbody;GO:005576//extracellular region;GO:0016020//membrane | GO:0010038//response to metal ion;GO:0009719;GO:0009608//response to symbiont;GO:0043900//regulation of multi-organism process;GO:0006464//cellular protein modification glutathione S-transferase DHAR1 |      |                                             |
|           |  |      |      |                                                                                                                                                                | GO:0043231//intracellular membrane-bounded organelle | GO:0015038//glutathione disulfide oxidoreductase activity;GO:0042277//microbody;GO:005576//extracellular region;GO:0016020//membrane | GO:0010038//response to metal ion;GO:0009719;GO:0009608//response to symbiont;GO:0043900//regulation of multi-organism process;GO:0006464//cellular protein modification glutathione S-transferase DHAR1 |      |                                             |
|           |  |      |      |                                                                                                                                                                | GO:0043231//intracellular membrane-bounded organelle | GO:0015038//glutathione disulfide oxidoreductase activity;GO:0042277//microbody;GO:005576//extracellular region;GO:0016020//membrane | GO:0010038//response to metal ion;GO:0009719;GO:0009608//response to symbiont;GO:0043900//regulation of multi-organism process;GO:0006464//cellular protein modification glutathione S-transferase DHAR1 |      |                                             |
|           |  |      |      |                                                                                                                                                                | GO:0043231//intracellular membrane-bounded organelle | GO:0015038//glutathione disulfide oxidoreductase activity;GO:0042277//microbody;GO:005576//extracellular region;GO:0016020//membrane | GO:0010038//response to metal ion;GO:0009719;GO:0009608//response to symbiont;GO:0043900//regulation of multi-organism process;GO:0006464//cellular protein modification glutathione S-transferase DHAR1 |      |                                             |
|           |  |      |      |                                                                                                                                                                | GO:0043231//intracellular membrane-bounded organelle | GO:0015038//glutathione disulfide oxidoreductase activity;GO:0042277//microbody;GO:005576//extracellular region;GO:0016020//membrane | GO:0010038//response to metal ion;GO:0009719;GO:0009608//response to symbiont;GO:0043900//regulation of multi-organism process;GO:0006464//cellular protein modification glutathione S-transferase DHAR1 |      |                                             |
|           |  |      |      |                                                                                                                                                                | GO:0043231//intracellular membrane-bounded organelle | GO:0015038//glutathione disulfide oxidoreductase activity;GO:0042277//microbody;GO:005576//extracellular region;GO:0016020//membrane | GO:0010038//response to metal ion;GO:0009719;GO:0009608//response to symbiont;GO:0043900//regulation of multi-organism process;GO:0006464//cellular protein modification glutathione S-transferase DHAR1 |      |                                             |
|           |  |      |      |                                                                                                                                                                | GO:0043231//intracellular membrane-bounded organelle | GO:0015038//glutathione disulfide oxidoreductase activity;GO:0042277//microbody;GO:005576//extracellular region;GO:0016020//membrane | GO:0010038//response to metal ion;GO:0009719;GO:0009608//response to symbiont;GO:0043900//regulation of multi-organism process;GO:0006464//cellular protein modification glutathione S-transferase DHAR1 |      |                                             |
|           |  |      |      |                                                                                                                                                                | GO:0043231//intracellular membrane-bounded organelle | GO:0015038//glutathione disulfide oxidoreductase activity;GO:0042277//microbody;GO:005576//extracellular region;GO:0016020//membrane | GO:0010038//response to metal ion;GO:0009719;GO:0009608//response to symbiont;GO:0043900//regulation of multi-organism process;GO:0006464//cellular protein modification glutathione S-transferase DHAR1 |      |                                             |
|           |  |      |      |                                                                                                                                                                | GO:0043231//intracellular membrane-bounded organelle | GO:0015038//glutathione disulfide oxidoreductase activity;GO:0042277//microbody;GO:005576//extracellular region;GO:0016020//membrane | GO:0010038//response to metal ion;GO:0009719;GO:0009608//response to symbiont;GO:0043900//regulation of multi-organism process;GO:0006464//cellular protein modification glutathione S-transferase DHAR1 |      |                                             |
|           |  |      |      |                                                                                                                                                                | AT4G37410                                            | √                                                                                                                                    | 1.07                                                                                                                                                                                                     | 2.10 | K00517 1 0.0 902 ath:AT4G37410 [EC:1.14.--] |

|           |   |       |      |                                                                                                                                                                    |                                  |                                                                                         |                                                                                                                                       |                                    |                              |
|-----------|---|-------|------|--------------------------------------------------------------------------------------------------------------------------------------------------------------------|----------------------------------|-----------------------------------------------------------------------------------------|---------------------------------------------------------------------------------------------------------------------------------------|------------------------------------|------------------------------|
| AT1G21110 |   | 1.11  | 2.16 | K05279 1 2e-80 298 ath:AT5G54160 flavonol 3-O-methyltransferase [EC:2.1.1.76];K13066 5 1e-72 272 pop:POPTR_824484 caffeic acid 3-O-methyltransferase [EC:2.1.1.68] | GO:0044444//cytoplasmic part     | GO:0005515//protein binding;GO:0008168//methyltransferase activity                      | GO:0006730//one-carbon metabolic process                                                                                              | O-methyltransferase family protein |                              |
| AT5G13930 | √ | 0.77  | 1.71 | K00660 1 0.0 790 ath:AT5G13930 chalcone synthase [EC:2.3.1.74]                                                                                                     | GO:0000325//plant-type vacuole   | GO:0016747//transferase activity, transferring acyl groups other than amino-acyl groups | GO:0009411//response to UV;GO:0009718//anthocyanin-containing compound biosynthetic process;GO:0009719;GO:0006950//response to stress | chalcone synthase                  | response to oxidative stress |
| AT3G22121 |   | -0.83 | 0.56 | -                                                                                                                                                                  | -                                | -                                                                                       | -                                                                                                                                     | -                                  | -                            |
| AT3G29780 |   | 1.48  | 2.80 | -                                                                                                                                                                  | GO:0005576//extracellular region | -                                                                                       | GO:0007154//cell communication;GO:0023052//signaling                                                                                  | protein ralf-like 27               |                              |

|       |           |   |       |      |                                                                                        |                                                                     |                                                                                              |                                                                                                      |                                           |                                                                                 |
|-------|-----------|---|-------|------|----------------------------------------------------------------------------------------|---------------------------------------------------------------------|----------------------------------------------------------------------------------------------|------------------------------------------------------------------------------------------------------|-------------------------------------------|---------------------------------------------------------------------------------|
| DEG29 | ATCG00440 | √ | -1.89 | 0.27 | K05574 1 4e-57 217 ath:ArthCp027 NAD(P)H-quinone oxidoreductase subunit 3 [EC:1.6.5.3] | GO:0031224//intrinsic to membrane;GO:0009534//chloroplast thylakoid | GO:0048037//cofactor binding;GO:0050136//NADH dehydrogenase (quinone) activity               | GO:0051234//establishment of localization;GO:0006091//generation of precursor metabolites and energy | NADH dehydrogenase subunit 3              | defense response to bacterium, oxidation-reduction process                      |
|       | AT5G39120 |   | -1.44 | 0.37 | -                                                                                      | GO:0044421//extracellular region part;GO:0044464//cell part         | GO:0046914//transition metal ion binding;GO:0016623;GO:0048037//cofactor binding             | GO:0006005//L-fucose biosynthetic process                                                            | germin-like protein subfamily 1 member 15 |                                                                                 |
| DEG25 | AT2G05540 |   | -0.93 | 0.53 | -                                                                                      | -                                                                   | -                                                                                            | -                                                                                                    | Glycine-rich protein family               |                                                                                 |
|       | AT3G49960 | √ | 0.96  | 1.94 | K00430 1 0.0 661 ath:AT3G49960 peroxidase [EC:1.11.1.7]                                | GO:0044424//intracellular part                                      | GO:0005506//iron ion binding;GO:0003824//catalytic activity;GO:0016209//antioxidant activity | GO:0006970//response to osmotic stress;GO:0008152//metabolic process                                 | peroxidase 35                             | oxidation-reduction process, peroxidase activity, response to oxidative stress, |

|       |           |   |       |      |                                                                                                                                                                   |                                                                                                                                                                                                                                |                                                                       |                                                                                                                                            |                                                  |                                                  |
|-------|-----------|---|-------|------|-------------------------------------------------------------------------------------------------------------------------------------------------------------------|--------------------------------------------------------------------------------------------------------------------------------------------------------------------------------------------------------------------------------|-----------------------------------------------------------------------|--------------------------------------------------------------------------------------------------------------------------------------------|--------------------------------------------------|--------------------------------------------------|
|       |           |   |       |      | K01501 1 0.0 707 ath:AT3G44320 nitrilase [EC:3.5.5.1];K13035 4 2e-132 470 aly:ARALYDRAFT_662033 beta-eta-cyano-L-alanine hydratase/nitrilase [EC:3.5.5.1 3.5.5.4] | GO:0009536//plastid;GO:0005576//extracellular region;GO:0016020//membrane                                                                                                                                                      | GO:0018822//nitrile hydratase activity;GO:0000257//nitrilase activity | GO:0051707//response to other organism;GO:0009683;GO:0010038//response to metal ion;GO:0009267//cellular response to starvation;GO:0019759 | nitrilase 3                                      | response to cadmium ion                          |
| DEG27 | AT3G15450 | √ | -1.53 | 0.35 | -                                                                                                                                                                 | GO:0016020//membrane;GO:0044444//cytoplasmic part;GO:0043231//intracellular membrane-bound organelle;GO:0016020//membrane;GO:0044444//cytoplasmic part;GO:0043231//intracellular membrane-bound organelle;GO:0016020//membrane | -                                                                     | -                                                                                                                                          | aluminum induced protein with YGL and LRDR motif | Aluminum induced protein with YGL and LRDR motif |

|           |   |       |      |                                                                                                                                                                                                                       |                                                    |                                                                                                   |                                                                                                                                                         |                                                        |                         |
|-----------|---|-------|------|-----------------------------------------------------------------------------------------------------------------------------------------------------------------------------------------------------------------------|----------------------------------------------------|---------------------------------------------------------------------------------------------------|---------------------------------------------------------------------------------------------------------------------------------------------------------|--------------------------------------------------------|-------------------------|
| AT3G22142 |   | -0.85 | 0.55 | -                                                                                                                                                                                                                     | -                                                  | GO:0005488//<br>binding                                                                           | GO:0010876                                                                                                                                              | seed storage<br>protein-like protein                   |                         |
| AT5G4790  | √ | 1.26  | 2.39 | [EC:1.14.13.28];K15814 4 8e-92 336 gmx:100037459 beta-amyrin 24-hydroxylase [EC:1.14.99.43];K13257 5 6e-79 293 gmx:100037450 cytochrome P450, family 93, subfamily C (2-hydroxyisoflavanone synthase) [EC:1.14.13.86] | GO:0043231//intracellular membrane-bound organelle | GO:0005506//iron binding;GO:0016627//oxidoreductase activity, acting on the CH-CH group of donors | GO:0010683;GO:0048513//organ development                                                                                                                | cytochrome P450 705A5                                  | oxidoreductase activity |
| AT3G22840 |   | 1.30  | 2.46 | -                                                                                                                                                                                                                     | -                                                  | -                                                                                                 | GO:0006950//<br>response to stress;GO:0015995//chlorophyll biosynthetic process;GO:0009639//response to red or far red light;GO:0009411//response to UV | chlorophyll A-B binding, early light-inducible protein |                         |



|       |           |   |      |      |   |   |   |   |                                                                                                                                                                                                                                                                                                             |
|-------|-----------|---|------|------|---|---|---|---|-------------------------------------------------------------------------------------------------------------------------------------------------------------------------------------------------------------------------------------------------------------------------------------------------------------|
| DEG12 | AT3G49580 |   | 1.42 | 2.68 | - | - | - | - | response to low sulfur 1 protein                                                                                                                                                                                                                                                                            |
|       | AT1G06640 | √ | 0.96 | 1.95 | - | - | - | - | oxidation-reduction process, oxidoreductase activity                                                                                                                                                                                                                                                        |
|       |           |   |      |      |   |   |   |   | GO:0016641//oxidoreductase activity, acting on the CH-NH2 group of donors, oxygen as acceptor;GO:0016706//oxidoreductase activity, acting on paired donors, with incorporation or reduction of molecular oxygen, 2-oxoglutarate as one donor, and incorporation of one atom each of oxygen into both donors |
|       |           |   |      |      |   |   |   |   | GO:0008152//metabolic process;GO:0008152//metabolic process;GO:0008152//metabolic process                                                                                                                                                                                                                   |

|       |           |   |       |      |   |                                                                                                                                                                                                                                                       |                                                                                                                                  |                                                                                                                                                 |                                                                                                                             |   |                                          |                                               |
|-------|-----------|---|-------|------|---|-------------------------------------------------------------------------------------------------------------------------------------------------------------------------------------------------------------------------------------------------------|----------------------------------------------------------------------------------------------------------------------------------|-------------------------------------------------------------------------------------------------------------------------------------------------|-----------------------------------------------------------------------------------------------------------------------------|---|------------------------------------------|-----------------------------------------------|
| DEG9  | AT5G23010 |   | 0.87  | 1.83 |   | K15741 1 0.0 967 ath:AT5G23010 methylthioalkylmalate synthase 1<br>[EC:2.3.3.-];K15742 3 0.0 757 ath:AT5G23020 methylthioalkylmalate synthase 3<br>[EC:2.3.3.-];K01649 5 3e-154 543 aly:ARALYDRAFT_472070 2-isopropylmalate synthase<br>[EC:2.3.3.13] | GO:0009536//plastid                                                                                                              | GO:0046912//transferase activity, transferring acyl groups, acyl groups converted into alkyl on transfer                                        | GO:0043436;GO:001975                                                                                                        | 8 | methylthioalkylmalate synthase 1         |                                               |
|       | AT1G09560 |   | -0.78 | 0.58 | - |                                                                                                                                                                                                                                                       | GO:0043231//intracellular membrane-bound organelle;GO:0005576//extracellular region;GO:0030312//external encapsulating structure | GO:0016209//antioxidant activity;GO:0046914//transition metal ion binding;GO:0004871//signal transducer activity;GO:0003824//catalytic activity | GO:0006950//response to stress;GO:0008152//metabolic process                                                                |   | germin-like protein subfamily 2 member 1 |                                               |
| DEG11 | AT1G14960 | √ | 1.50  | 2.83 | - |                                                                                                                                                                                                                                                       | GO:0044444//cytoplasmic part                                                                                                     | GO:0046914//transition metal ion binding                                                                                                        | GO:0006950//response to stress;GO:0003006//developmental process involved in reproduction;GO:0010038//response to metal ion |   | major latex-related protein              | response to biotic stimulus, defense response |

|           |   |      |      |   |                                                                                         |                                                                                                                                                           |                                                                                                           |                                                                                                                                                                                             |                                      |                                               |
|-----------|---|------|------|---|-----------------------------------------------------------------------------------------|-----------------------------------------------------------------------------------------------------------------------------------------------------------|-----------------------------------------------------------------------------------------------------------|---------------------------------------------------------------------------------------------------------------------------------------------------------------------------------------------|--------------------------------------|-----------------------------------------------|
| AT3G68550 |   | 1.76 | 3.38 | - |                                                                                         | GO:0016787//hydrolytic activity;GO:0005488//binding                                                                                                       | GO:0031224//intrinsic to membrane                                                                         | GO:0010876                                                                                                                                                                                  | seed storage 2S albumin-like protein |                                               |
| AT1G18870 |   | 1.57 | 2.96 |   | K02552 1 0.0 959 ath:AT1G18870 menaquinone-specific isochorismate synthase [EC:5.4.4.2] | GO:0050486//intramolecular transferase activity, transferring hydroxy groups;GO:0050486//intramolecular transferase activity, transferring hydroxy groups | GO:0043231//intracellular membrane-bounded organelle;GO:0043231//intracellular membrane-bounded organelle | GO:0009696//salicylic acid metabolic process;GO:0042371//vitamin K biosynthetic process;GO:0009814//defense response, incompatible interaction;GO:0009696//salicylic acid metabolic process | Isochorismate synthase 2             |                                               |
| AT5G44550 |   | 1.18 | 2.26 | - |                                                                                         |                                                                                                                                                           | GO:0044464//cell part                                                                                     | -                                                                                                                                                                                           | uncharacterized protein              |                                               |
| AT4G14060 | √ | 1.89 | 3.70 | - |                                                                                         | GO:0046914//transit ion metal ion binding                                                                                                                 | GO:0044444//cytoplasmic part                                                                              | GO:0006950//response to stress;GO:0003006//developmental process involved in reproduction;GO:0010038//response to metal ion                                                                 | major latex protein-like protein     | response to biotic stimulus, defense response |

|       |           |      |      |                                                                                                                                                                                                                                               |                                                                                                           |                                                                                                          |                                                                                                                  |                                       |
|-------|-----------|------|------|-----------------------------------------------------------------------------------------------------------------------------------------------------------------------------------------------------------------------------------------------|-----------------------------------------------------------------------------------------------------------|----------------------------------------------------------------------------------------------------------|------------------------------------------------------------------------------------------------------------------|---------------------------------------|
| DEG17 | AT5G23020 | 1.15 | 2.22 | K15742 1 0.0 966 ath:AT5G23020 methylthioalkylmalate synthase 3<br>[EC:2.3.3.-];K15741 3 0.0 761 ath:AT5G23010 methylthioalkylmalate synthase 1<br>[EC:2.3.3.-];K01649 5 1e-155 548 rcu:RCOM_1267040 2-isopropylmalate synthase [EC:2.3.3.13] | GO:0009536//plastid                                                                                       | GO:0046912//transferase activity, transferring acyl groups, acyl groups converted into alkyl on transfer | GO:0019758;GO:0006551//leucine metabolic process                                                                 | methylthioalkylmalate synthase 3      |
|       | AT1G45201 | 0.85 | 1.81 | -                                                                                                                                                                                                                                             | GO:0043231//intracellular membrane-bounded organelle;GO:0043231//intracellular membrane-bounded organelle | GO:0004091//carboxylesterase activity;GO:0004091//carboxylesterase activity                              | GO:0044238//primary metabolic process;GO:0044238//primary metabolic process                                      | triacylglycerol lipase-like 1 protein |
| DEG15 | AT3G02020 | 1.34 | 2.53 | K00928 1 0.0 1087 ath:AT3G02020 aspartate kinase<br>[EC:2.7.2.4]                                                                                                                                                                              | -                                                                                                         | GO:0031406//carboxylic acid binding;GO:0016774//phosphotransferase activity, carboxyl group as acceptor  | GO:0008652//cellular amino acid biosynthetic process;GO:0006796//phosphate-containing compound metabolic process | aspartokinase 3                       |

|       |           |   |       |      |   |                                                                                                                                                                                                   |                                                      |                                                                                                |                                                                             |                                          |                                |
|-------|-----------|---|-------|------|---|---------------------------------------------------------------------------------------------------------------------------------------------------------------------------------------------------|------------------------------------------------------|------------------------------------------------------------------------------------------------|-----------------------------------------------------------------------------|------------------------------------------|--------------------------------|
| DEG20 | AT2G43535 | √ | 2.58  | 5.99 | - |                                                                                                                                                                                                   | GO:0044464//cell part                                | GO:0016248//channel inhibitor activity;GO:0004866//endopeptidase inhibitor activity            | GO:0001906//cell killing;GO:0006952//defense response                       | defensin-like protein 196                | defense response               |
| DEG16 | AT4G13860 |   | 1.23  | 2.35 |   | K02965 1 7e-16 80.1 ath:AT5G47320 small subunit ribosomal protein S19;K13195 2 1e-15 79.7 pop:POPTR_712972 cold-inducible RNA-binding protein;K13095 3 8e-15 76.6 zma:100383202 splicing factor 1 | GO:0043231//intracellular membrane-bounded organelle | GO:0046914//transition metal ion binding;GO:0043566//structure-specific DNA binding;GO:0032559 | GO:0032501//multicellular organismal process;GO:0006950//response to stress | RNA recognition motif-containing protein |                                |
| DEG4  | AT5G24660 | √ | 1.07  | 2.10 | - |                                                                                                                                                                                                   |                                                      |                                                                                                |                                                                             | response to low sulfur 2                 | regulation of defense response |
|       | ATCG00090 |   | -1.31 | 0.40 | - |                                                                                                                                                                                                   |                                                      |                                                                                                |                                                                             | unnamed protein product (chloroplast)    |                                |
|       | AT2G15960 |   | -1.48 | 0.36 | - |                                                                                                                                                                                                   |                                                      |                                                                                                |                                                                             | uncharacterized protein                  |                                |

|           |      |      |                                                                                                                                                                                                                                                                                                                       |                                           |                                                                                                 |                                                                                                          |                                                                                                |
|-----------|------|------|-----------------------------------------------------------------------------------------------------------------------------------------------------------------------------------------------------------------------------------------------------------------------------------------------------------------------|-------------------------------------------|-------------------------------------------------------------------------------------------------|----------------------------------------------------------------------------------------------------------|------------------------------------------------------------------------------------------------|
| AT4G35160 | 1.16 | 2.23 | <p>K16040 1 8e-49 192 vvi:100233<br/> 030 trans-resveratrol<br/> di-O-methyltransferase<br/> [EC:2.1.1.240];K13066 2 1e-36 <br/> 152 pop:POPTR_824484 caffeic<br/> acid 3-O-methyltransferase<br/> [EC:2.1.1.68];K05279 3 4e-36 1<br/> 50 pop:POPTR_834247 flavonol<br/> 3-O-methyltransferase<br/> [EC:2.1.1.76]</p> | <p>GO:0044444//cytop<br/> lasmic part</p> | <p>GO:0005515//protei<br/> n<br/> binding;GO:000816<br/> 8//methyltransferase<br/> activity</p> | <p>GO:0006730//one-carbo<br/> n metabolic process</p>                                                    | <p>O-methyltransferase<br/> family 2 protein</p>                                               |
| DEG19     | 1.32 | 2.50 | -                                                                                                                                                                                                                                                                                                                     | <p>-<br/> GO:0044464//cell<br/> part</p>  | <p>-<br/> -</p>                                                                                 | <p>GO:0009267//cellular<br/> response to<br/> starvation;GO:0006791//<br/> sulfur utilization<br/> -</p> | <p>tetratricopeptide<br/> repeat<br/> domain-containing<br/> protein<br/> PEE-rich protein</p> |
| AT5G09480 | 1.62 | 3.07 | -                                                                                                                                                                                                                                                                                                                     |                                           |                                                                                                 |                                                                                                          |                                                                                                |

WT(ZmO2L1) VS WT

| DEG Number | GeneID    | Stress or metal ion transport related genes | Log <sub>2</sub> Ratio WT(ZmO2L1) VS WT | Fold Change WT(ZmO2L1) VS WT | KEGG Orthology                                                                                                                                 | GO Component                                                                                           | GO Function                                                                                                                                | GO Process                                                                                               | Results of blast against nr database | TAIR Annotation(Key Words)                           |
|------------|-----------|---------------------------------------------|-----------------------------------------|------------------------------|------------------------------------------------------------------------------------------------------------------------------------------------|--------------------------------------------------------------------------------------------------------|--------------------------------------------------------------------------------------------------------------------------------------------|----------------------------------------------------------------------------------------------------------|--------------------------------------|------------------------------------------------------|
| DEG18      | AT5G26220 | √                                           | 1.13                                    | 2.18                         | K07232 1 2e-51 200 osa:4335982 cation transport protein ChaC                                                                                   | -                                                                                                      | -                                                                                                                                          | GO:0010038//response to metal ion                                                                        | ChaC-like family protein             | response to cadmium ion, response to lead ion        |
|            | AT1G77120 | √                                           | 1.10                                    | 2.15                         | K00001 1 0.0 741 ath:AT1G77120 alcohol dehydrogenase [EC:1.1.1.1]                                                                              | GO:0044444//cytoplasmic part;GO:0016020//membrane                                                      | GO:0046914//transition metal ion binding;GO:0016616//oxidoreductase activity, acting on the CH-OH group of donors, NAD or NADP as acceptor | GO:0006970//response to osmotic stress;GO:0008152//metabolic process;GO:0010038//response to metal ion   | alcohol dehydrogenase class-P        | oxidation-reduction process                          |
|            | AT1G77760 | √                                           | -0.88                                   | 0.54                         | K00360 1 0.0 1008 ppp:P HYPADRAFT_184973 nitrate reductase (NADH) [EC:1.7.1.1];K00387 4 1e-108 392 olu:OSTLU_3554 sulfite oxidase [EC:1.8.3.1] | GO:0043231//intracellular membrane-bounded organelle;GO:0044444//cytoplasmic part;GO:0016020//membrane | GO:0005506//iron ion binding;GO:0050662//coenzyme binding;GO:0008940//nitrate reductase activity                                           | GO:0009314//response to radiation;GO:0009608//response to symbiont;GO:0042126//nitrate metabolic process | nitrate reductase [NADH]             | oxidation-reduction process, oxidoreductase activity |

|      |           |   |      |      |   |                                                                                                                                                       |                                                                                  |                                                                                                                     |                                                                  |                                                          |                                          |
|------|-----------|---|------|------|---|-------------------------------------------------------------------------------------------------------------------------------------------------------|----------------------------------------------------------------------------------|---------------------------------------------------------------------------------------------------------------------|------------------------------------------------------------------|----------------------------------------------------------|------------------------------------------|
|      | AT4G16260 | √ | 0.76 | 1.69 | - | GO:0031090//organelle membrane;GO:0030312//external encapsulating structure                                                                           | GO:0016798//hydrolase activity, acting on glycosyl bonds;GO:0043167//ion binding | GO:0006970//response to osmotic stress;GO:0050832//defense response to fungus;GO:0044238//primary metabolic process | catalytic/ cation binding / hydrolase                            | defense response to fungus, defense response to nematode |                                          |
|      | AT5G22460 |   | 1.43 | 2.70 | - | GO:0005618//cell wall;GO:0043231//intracellular membrane-bounded organelle;GO:0005618//cell wall;GO:0043231//intracellular membrane-bounded organelle | -                                                                                | -                                                                                                                   | esterase/lipase/thioesterase family protein                      |                                                          |                                          |
| DEG5 | AT3G49570 |   | 1.00 | 2.00 | - | -                                                                                                                                                     | -                                                                                | -                                                                                                                   | response to low sulfur 3 protein                                 |                                                          |                                          |
| DEG1 | AT1G75280 | √ | 0.94 | 1.91 |   | K00224 1 5e-173 605 ath :AT1G75280 [EC:1.3.1.-]; K13081 4 1e-64 245 pop: POPTR_835080 leucoanthocyanidin reductase [EC:1.17.1.3]                      | GO:0016020//membrane                                                             | GO:0016491//oxidoreductase activity                                                                                 | GO:0006950//response to stress;GO:0010038//response to metal ion | Isoflavone reductase-P3                                  | Involved in response to oxidative stress |
|      | AT4G01700 | √ | 1.10 | 2.14 |   | K01183 1 7e-91 332 ath: AT3G12500 chitinase [EC:3.2.1.14]                                                                                             | GO:0030312//external encapsulating structure                                     | GO:0004553//hydrolase activity, hydrolyzing O-glycosyl compounds                                                    | GO:0006026                                                       | class II chitinase-like protein                          | defense response to fungus               |





|       |           |      |       |      |                                                                                                                                              |                                                                |                                                                                                                                                        |                                                                                                                                   |                             |                                                      |
|-------|-----------|------|-------|------|----------------------------------------------------------------------------------------------------------------------------------------------|----------------------------------------------------------------|--------------------------------------------------------------------------------------------------------------------------------------------------------|-----------------------------------------------------------------------------------------------------------------------------------|-----------------------------|------------------------------------------------------|
| DEG14 | AT1G51420 | 1.05 | 2.07  | -    | GO:0031090//organelle membrane                                                                                                               | GO:0046872//metal ion binding;GO:0016791//phosphatase activity | GO:0005985//sucrose metabolic process;GO:0006796//phosphate-containing compound metabolic process                                                      | sucrose-phosphatase 1                                                                                                             |                             |                                                      |
|       | AT3G09220 | √    | -1.58 | 0.33 | K00423 1 7e-60 230 ppp:PHYPADRAFT_163787 L-ascorbate oxidase [EC:1.10.3.3]                                                                   | GO:0005576//extracellular region                               | GO:0046914//transition metal ion binding;GO:0016682//oxidoreductase activity, acting on diphenols and related substances as donors, oxygen as acceptor | GO:0003006//developmental process involved in reproduction;GO:0009808//lignin metabolic process;GO:0010038//response to metal ion | laccase 7                   | oxidation-reduction process, oxidoreductase activity |
|       | AT3G58990 | 0.97 | 1.96  |      | K01704 1 1e-143 507 ath:AT3G58990 3-isopropylmalate/(R)-2-methylmalate dehydratase small subunit [EC:4.2.1.33 4.2.1.35]                      | GO:0043234//protein complex;GO:0009532//plastid stroma         | GO:0016836//hydro-lyase activity                                                                                                                       | GO:0006970//response to osmotic stress;GO:0006551//leucine metabolic process                                                      | isopropylmalate isomerase 1 |                                                      |
|       | AT3G08860 | 1.57 | 2.96  |      | K00827 1 0.0 958 ath:AT3G08860 alanine-glyoxylate transaminase / (R)-3-amino-2-methylpropionate-pyruvate transaminase [EC:2.6.1.44 2.6.1.40] | GO:0043231//intracellular membrane-bounded organelle           | GO:0008483//transaminase activity;GO:0048037//cofactor binding                                                                                         | GO:0031669//cellular response to nutrient levels                                                                                  | PYRIMIDINE 4                |                                                      |

|           |   |       |      |                                                                                             |                                                                                                                                                                         |                                                                                                                                                                                              |                                                                                                                                                                                                                                                                                                                                                                                                                                        |                                   |                                                      |
|-----------|---|-------|------|---------------------------------------------------------------------------------------------|-------------------------------------------------------------------------------------------------------------------------------------------------------------------------|----------------------------------------------------------------------------------------------------------------------------------------------------------------------------------------------|----------------------------------------------------------------------------------------------------------------------------------------------------------------------------------------------------------------------------------------------------------------------------------------------------------------------------------------------------------------------------------------------------------------------------------------|-----------------------------------|------------------------------------------------------|
| AT5G02160 |   | -0.83 | 0.56 | -                                                                                           | GO:0009534//chloroplast thylakoid                                                                                                                                       | GO:0005515//protein binding                                                                                                                                                                  | GO:0044267//cellular protein metabolic process                                                                                                                                                                                                                                                                                                                                                                                         | uncharacterized protein           |                                                      |
| AT5G14200 | √ | 0.87  | 1.83 | K00052 1 0.0 701 aly:AR<br>ALYDRAFT_473708 3-isopropylmalate dehydrogenase<br>[EC:1.1.1.85] | GO:0009532//plastid stroma;GO:0009526//plastid envelope;GO:0009532//plastid stroma;GO:0009526//plastid envelope;GO:0009532//plastid stroma;GO:0009526//plastid envelope | GO:0046872//metal ion binding;GO:0016616//oxidoreductase activity, acting on the CH-OH group of donors, NAD or NADP as acceptor;GO:0000166//nucleotide binding;GO:0046872//metal ion binding | GO:0006551//leucine metabolic process;GO:0008652//cellular amino acid biosynthetic process;GO:0006970//response to osmotic stress;GO:0019758;GO:0006551//leucine metabolic process;GO:0008652//cellular amino acid biosynthetic process;GO:0006970//response to osmotic stress;GO:0019758;GO:0006551//leucine metabolic process;GO:0008652//cellular amino acid biosynthetic process;GO:0006970//response to osmotic stress;GO:0019758 | 3-isopropylmalate dehydrogenase 3 | oxidation-reduction process, oxidoreductase activity |

|           |           |       |      |                                                                                                                                                                                                                |                                                                                                               |                                                                                                                                                                                                                       |                                                                                                                                                                                                                    |                                                                                                                                                                                         |                                                                        |
|-----------|-----------|-------|------|----------------------------------------------------------------------------------------------------------------------------------------------------------------------------------------------------------------|---------------------------------------------------------------------------------------------------------------|-----------------------------------------------------------------------------------------------------------------------------------------------------------------------------------------------------------------------|--------------------------------------------------------------------------------------------------------------------------------------------------------------------------------------------------------------------|-----------------------------------------------------------------------------------------------------------------------------------------------------------------------------------------|------------------------------------------------------------------------|
| DEG3      | AT2G39310 | 0.92  | 1.89 | -                                                                                                                                                                                                              | GO:0009536//plastid;GO:0009536/<br>/plastid;GO:0009536//plastid                                               | GO:0030246//carbohydrate<br>binding;GO:0030246//carbo<br>hydrate<br>binding;GO:0030246//carbo<br>hydrate binding                                                                                                      | GO:0009719;GO:0006970//resp<br>onse to osmotic<br>stress;GO:0009719;GO:000697<br>0//response to osmotic<br>stress;GO:0009719;GO:000697<br>0//response to osmotic stress                                            | jacalin-related<br>lectin 22                                                                                                                                                            |                                                                        |
|           | AT1G67148 | 1.49  | 2.81 | -                                                                                                                                                                                                              | -                                                                                                             | -                                                                                                                                                                                                                     | -                                                                                                                                                                                                                  | -                                                                                                                                                                                       |                                                                        |
|           | AT2G34430 | -1.00 | 0.50 |                                                                                                                                                                                                                | K08912 1 3e-147 519 ath<br>:AT2G34430 light-harves<br>ting complex II<br>chlorophyll a/b binding<br>protein 1 | GO:0031224//intrinsic to<br>membrane;GO:0009521;GO:0009<br>526//plastid<br>envelope;GO:0009534//chloroplast<br>thylakoid;GO:0009570//chloroplast<br>stroma;GO:0005576//extracellular<br>region                        | GO:0043169//cation<br>binding;GO:0046906//tetrap<br>yrrole binding                                                                                                                                                 | GO:0009746;GO:0006091//gene<br>ration of precursor metabolites<br>and<br>energy;GO:0009639//response<br>to red or far red<br>light;GO:0006464//cellular<br>protein modification process | light-harvesting<br>complex II<br>chlorophyll a/b<br>binding protein 1 |
| AT3G48360 | √         | -1.07 | 0.48 | K00517 1 0.0 711 ath:AT<br>3G48360 [EC:1.14.-.-];K0<br>4498 3 4e-08 57.8 ath:AT<br>3G12980 E1A/CREB-bin<br>ding protein<br>[EC:2.3.1.48];K10523 5 2<br>e-06 52.4 zma:10019161<br>8 speckle-type POZ<br>protein | GO:0043231//intracellular<br>membrane-bounded organelle                                                       | GO:0000989//transcription<br>factor binding transcription<br>factor<br>activity;GO:0004468//lysine<br>N-acetyltransferase<br>activity;GO:0046914//transit<br>ion metal ion<br>binding;GO:0005515//protei<br>n binding | GO:0000302//response to<br>reactive oxygen<br>species;GO:0009756//carbohydr<br>ate mediated<br>signaling;GO:0048229//gametop<br>hyte<br>development;GO:0051347//posit<br>ive regulation of transferase<br>activity | BTB and TAZ<br>domain protein 2                                                                                                                                                         | response to hydrogen<br>peroxide                                       |

## DEG28

ATCG00800

-0.83 0.56 K02982|1|3e-113|405|ath GO:0000314//organelle small GO:0003723//RNA ribosomal protein S3  
 :ArthCp061|small subunit ribosomal binding;GO:0005198//structural molecule activity GO:0010467//gene expression  
 ribosomal protein S3 subunit;GO:0009536//plastid

AT1G23730

1.07 2.10 K01673|1|9e-148|521|ath GO:0009526//plastid envelope;GO:0016020//membrane GO:0046914//transition metal ion GO:0010035//response to inorganic substance;GO:0010118//stomatal movement  
 :AT1G23730|carbonic anhydrase [EC:4.2.1.1] binding;GO:0016836//hydrolyase activity GO:0005488//binding;GO:001071//nucleic acid binding transcription factor activity GO:0006351//transcription, DNA-dependent

AT5G04150

-1.18 0.44 - GO:0043231//intracellular membrane-bounded organelle GO:0005488//binding;GO:001071//nucleic acid binding transcription factor activity GO:0006351//transcription, DNA-dependent

AT4G13395

2.01 4.03 - GO:0043231//intracellular membrane-bounded organelle GO:0048513//organ development protein rotundifolia like 12

AT2G46390

0.85 1.81 - - - - - uncharacterized protein

|       |           |   |      |      |                                                                                                                                                                                                                                                                                                                         |                                                                                                                     |                                                                                                                                                        |                                                                                                                     |                                                                                           |
|-------|-----------|---|------|------|-------------------------------------------------------------------------------------------------------------------------------------------------------------------------------------------------------------------------------------------------------------------------------------------------------------------------|---------------------------------------------------------------------------------------------------------------------|--------------------------------------------------------------------------------------------------------------------------------------------------------|---------------------------------------------------------------------------------------------------------------------|-------------------------------------------------------------------------------------------|
| DEG22 | AT1G18100 |   | 1.75 | 3.37 | K06910 1 5e-06 50.8 sm<br>o:SELMODRAFT_14376<br>2]                                                                                                                                                                                                                                                                      | GO:0043231//intracellular<br>membrane-bounded organelle                                                             | GO:0016788//hydrolase<br>activity, acting on ester<br>bonds;GO:0003676//nucleic<br>acid binding                                                        | GO:0006259//DNA metabolic<br>process;GO:0009725//response<br>to hormone<br>stimulus;GO:0009845//seed<br>germination | protein MOTHER<br>of FT and TF 1                                                          |
| DEG10 | AT1G16410 | √ | 1.67 | 3.17 | K12154 1 0.0 1058 ath:A<br>T1G16410 cytochrome<br>P450, family 79,<br>subfamily F,<br>polypeptide 1<br>[EC:1.14.13.-];K12155 3 <br>0.0 935 ath:AT1G16400 <br>cytochrome P450, family<br>79, subfamily F,<br>polypeptide 2<br>[EC:1.14.13.-];K13027 4 <br>4e-115 414 sbi:SORBI_0<br>1g001200 tyrosine<br>N-monooxygenase | GO:0043231//intracellular<br>membrane-bounded<br>organelle;GO:0043231//intracellula<br>r membrane-bounded organelle | GO:0004497//monooxygen<br>ase<br>activity;GO:0005506//iron<br>ion<br>binding;GO:0004497//mono<br>oxygenase<br>activity;GO:0005506//iron<br>ion binding | GO:0019758;GO:0019758                                                                                               | dihomomethionin<br>e N-hydroxylase<br>oxidoreductase activity,<br>oxidoreductase activity |

|       |           |        |      |   |                                                                                                              |                                                                                                                      |                                                                                                       |                                                    |                              |
|-------|-----------|--------|------|---|--------------------------------------------------------------------------------------------------------------|----------------------------------------------------------------------------------------------------------------------|-------------------------------------------------------------------------------------------------------|----------------------------------------------------|------------------------------|
|       |           |        |      |   |                                                                                                              | GO:0016783//sulfurtransferase activity;GO:0016783//sulfurtransferase activity;GO:0016783//sulfurtransferase activity | GO:0032502//developmental process;GO:0032502//developmental process;GO:0032502//developmental process | sulfurtransferase<br>18                            |                              |
| DEG21 | AT5G66170 | 0.98   | 1.98 | - | GO:0044424//intracellular part;GO:0044424//intracellular part;GO:0044424//intracellular part                 |                                                                                                                      |                                                                                                       |                                                    |                              |
|       | AT4G13420 | 1.85   | 3.61 |   | K03549 1 0.0 1320 aly:A<br>RALYDRAFT_682978 K<br>UP system potassium uptake protein<br>GO:0044464//cell part | GO:0022820//potassium ion symporter activity                                                                         | GO:0030001//metal ion transport;GO:0034220//ion transmembrane transport                               | Potassium transporter 5                            |                              |
|       | AT1G60130 | √ 1.57 | 2.97 | - | GO:0044464//cell part                                                                                        | -                                                                                                                    | GO:0006950//response to stress                                                                        | tetratricopeptide repeat domain-containing protein | response to oxidative stress |
| DEG30 | AT5G39110 | 0.97   | 1.96 | - | GO:0044421//extracellular region part;GO:0044464//cell part                                                  | GO:0046914//transition metal ion binding;GO:0016623;GO:0048037//cofactor binding                                     | GO:0006005//L-fucose biosynthetic process                                                             | germin-like protein subfamily 1 member 14          |                              |
|       | AT1G61740 | -0.92  | 0.53 | - | GO:0031224//intrinsic to membrane                                                                            | GO:0005488//binding                                                                                                  | -                                                                                                     | Sulfite exporter<br>TauE/SafE family protein       |                              |

|       |           |   |      |      |                                                                                             |                                                                                                      |                                                                                                                                                                                                          |                                                                                                                                                                                             |                                                                                                                                     |                                                                            |
|-------|-----------|---|------|------|---------------------------------------------------------------------------------------------|------------------------------------------------------------------------------------------------------|----------------------------------------------------------------------------------------------------------------------------------------------------------------------------------------------------------|---------------------------------------------------------------------------------------------------------------------------------------------------------------------------------------------|-------------------------------------------------------------------------------------------------------------------------------------|----------------------------------------------------------------------------|
| DEG8  | AT3G45140 | √ | 0.93 | 1.90 | K00454 1 0.0 1810 ath:A<br>T3G45140 lipoxygenase<br>[EC:1.13.11.12]                         | GO:0009532//plastid<br>stroma;GO:0009534//chloroplast<br>thylakoid                                   | GO:0046914//transition<br>metal ion<br>binding;GO:0016702//oxido<br>reductase activity, acting on<br>single donors with<br>incorporation of molecular<br>oxygen, incorporation of<br>two atoms of oxygen | GO:0051707//response to other<br>organism;GO:0006633//fatty<br>acid biosynthetic<br>process;GO:0009694//jasmonic<br>acid metabolic<br>process;GO:0009719;GO:00069<br>50//response to stress | lipoxygenase 2                                                                                                                      | Required for wound-induced<br>jasmonic acid accumulation in<br>Arabidopsis |
|       | AT3G54590 |   | 0.92 | 1.89 | -                                                                                           | -                                                                                                    | -                                                                                                                                                                                                        | -                                                                                                                                                                                           | hypothetical<br>protein<br>ARALYDRAFT_9<br>17863<br>S-adenosyl-L-met<br>hionine-dependen<br>t<br>methyltransferase<br>-like protein | transition metal ion transport                                             |
| DEG23 | AT5G37990 | √ | 1.49 | 2.82 | K08241 1 1e-44 179 rcu:<br>RCOM_1595240 jasmon<br>ate O-methyltransferase<br>[EC:2.1.1.141] | GO:0044464//cell part                                                                                | GO:0008171//O-methyltran<br>sferase activity                                                                                                                                                             | GO:0006730//one-carbon<br>metabolic process                                                                                                                                                 |                                                                                                                                     |                                                                            |
| DEG2  | AT1G78370 | √ | 0.91 | 1.88 | K00799 1 1e-73 274 gmx<br>:547936 glutathione<br>S-transferase<br>[EC:2.5.1.18]             | GO:0009532//plastid<br>stroma;GO:0031090//organelle<br>membrane;GO:0005576//extracellu<br>lar region | GO:0042277//peptide<br>binding;GO:0016765//transf<br>erase activity, transferring<br>alkyl or aryl (other than<br>methyl)<br>groups;GO:0005515//protei<br>n binding                                      | GO:0010038//response to metal<br>ion;GO:0009414//response to<br>water<br>deprivation;GO:0009404//toxin<br>metabolic<br>process;GO:0009639//response<br>to red or far red light              | glutathione<br>S-transferase<br>TAU 20                                                                                              | Encodes glutathione<br>transferase belonging to the<br>tau class of GSTs   |





|       |           |   |      |      |                                                                                                                                                                                                                                                                                                                                                                                   |                                                                                                                                                                                                                                                                                                         |                                                                                                                                                                                                                                     |                                                                                                                                                                                                                                              |                          |                                                         |           |   |       |      |                                                                         |                                                 |   |                                                                                                                                                |   |                                                                                   |
|-------|-----------|---|------|------|-----------------------------------------------------------------------------------------------------------------------------------------------------------------------------------------------------------------------------------------------------------------------------------------------------------------------------------------------------------------------------------|---------------------------------------------------------------------------------------------------------------------------------------------------------------------------------------------------------------------------------------------------------------------------------------------------------|-------------------------------------------------------------------------------------------------------------------------------------------------------------------------------------------------------------------------------------|----------------------------------------------------------------------------------------------------------------------------------------------------------------------------------------------------------------------------------------------|--------------------------|---------------------------------------------------------|-----------|---|-------|------|-------------------------------------------------------------------------|-------------------------------------------------|---|------------------------------------------------------------------------------------------------------------------------------------------------|---|-----------------------------------------------------------------------------------|
| DEG24 | AT5G48000 | √ | 1.35 | 2.55 | K00030 1[3e-79]294 vi:<br>100242228 isocitrate<br>dehydrogenase (NAD+)<br>[EC:1.1.1.41];K09587 2[8<br>e-66]249 sbi:SORBI_01g<br>041900 cytochrome<br>P450, family 90,<br>subfamily B, polypeptide<br>1 (steroid<br>22-alpha-hydroxylase)<br>[EC:1.14.13.-];K09588 3 <br>2e-65]248 gmx:1007758<br>86 cytochrome P450,<br>family 90, subfamily A,<br>polypeptide 1<br>[EC:1.14.-.-] | GO:0043231//intracellular<br>membrane-bounded<br>organelle;GO:0043231//intracellula<br>r membrane-bounded<br>organelle;GO:0043231//intracellula<br>r membrane-bounded<br>organelle;GO:0043231//intracellula<br>r membrane-bounded<br>organelle;GO:0043231//intracellula<br>r membrane-bounded organelle | GO:0004497//monooxygen<br>ase<br>activity;GO:0005506//iron<br>ion<br>binding;GO:0004497//mono<br>oxygenase<br>activity;GO:0005506//iron<br>ion<br>binding;GO:0004497//mono<br>oxygenase<br>activity;GO:0005506//iron<br>ion binding | GO:0010683;GO:0048513//orga<br>n<br>development;GO:0010683;GO:0<br>048513//organ<br>development;GO:0010683;GO:0<br>048513//organ<br>development;GO:0010683;GO:0<br>048513//organ<br>development;GO:0010683;GO:0<br>048513//organ development | cytochrome P450<br>708A2 | oxidation-reduction process,<br>oxidoreductase activity |           |   |       |      |                                                                         |                                                 |   |                                                                                                                                                |   |                                                                                   |
|       |           |   |      |      |                                                                                                                                                                                                                                                                                                                                                                                   |                                                                                                                                                                                                                                                                                                         |                                                                                                                                                                                                                                     |                                                                                                                                                                                                                                              |                          |                                                         | AT2G14610 | √ | -2.08 | 0.24 | K13449 1[2e-94]343 ath:<br>AT2G14610 pathogenesi<br>s-related protein 1 | GO:0030312//external<br>encapsulating structure | - | GO:0009725//response to<br>hormone<br>stimulus;GO:0033273//response<br>to vitamin;GO:0009814//defense<br>response, incompatible<br>interaction | - | defense response, defense<br>response to bacterium,<br>defense response to fungus |

|       |           |   |       |      |                                                                                                 |                                                                                                                                                                             |                                                                                              |                                                                                                                                                                      |                                     |                                                                                        |
|-------|-----------|---|-------|------|-------------------------------------------------------------------------------------------------|-----------------------------------------------------------------------------------------------------------------------------------------------------------------------------|----------------------------------------------------------------------------------------------|----------------------------------------------------------------------------------------------------------------------------------------------------------------------|-------------------------------------|----------------------------------------------------------------------------------------|
|       | AT4G29905 |   | -1.05 | 0.48 | -                                                                                               | -                                                                                                                                                                           | -                                                                                            | -                                                                                                                                                                    | uncharacterized protein             |                                                                                        |
|       | AT1G29920 |   | -0.76 | 0.59 | K08912 1 1e-154 544 ath:AT1G29920 light-harvesting complex II chlorophyll a/b binding protein 1 | GO:0031224//intrinsic to membrane;GO:0009521;GO:0009526//plastid envelope;GO:0009534//chloroplast thylakoid;GO:0009570//chloroplast stroma;GO:0005576//extracellular region | GO:0043169//cation binding;GO:0046906//tetrapyrrole binding                                  | GO:0009746;GO:0006091//generation of precursor metabolites and energy;GO:0009639//response to red or far red light;GO:0006464//cellular protein modification process | chlorophyll a-b binding protein 2/3 |                                                                                        |
|       | AT4G33070 | √ | 0.96  | 1.95 | K01568 1 0.0 1240 ath:AT4G33070 pyruvate decarboxylase [EC:4.1.1.1]                             | GO:0044464//cell part                                                                                                                                                       | GO:0046872//metal ion binding;GO:0016831//carboxy-lyase activity;GO:0019842//vitamin binding | -                                                                                                                                                                    | pyruvate decarboxylase              | regulation of hydrogen peroxide metabolic process                                      |
| DEG29 | ATCG00440 | √ | -1.25 | 0.42 | K05574 1 4e-57 217 ath:ArthCp027 NAD(P)H-quinone oxidoreductase subunit 3 [EC:1.6.5.3]          | GO:0031224//intrinsic to membrane;GO:0009534//chloroplast thylakoid                                                                                                         | GO:0048037//cofactor binding;GO:0050136//NADH dehydrogenase (quinone) activity               | GO:0051234//establishment of localization;GO:0006091//generation of precursor metabolites and energy                                                                 | NADH dehydrogenase subunit 3        | Encodes NADH dehydrogenase D3 subunit of the chloroplast NAD(P)H dehydrogenase complex |



|           |           |      |       |      |   |                                                                                                                                                                                                                                                                                                                        |                                                                  |                                                                                            |                                                                                                                                                                                                   |                                                  |
|-----------|-----------|------|-------|------|---|------------------------------------------------------------------------------------------------------------------------------------------------------------------------------------------------------------------------------------------------------------------------------------------------------------------------|------------------------------------------------------------------|--------------------------------------------------------------------------------------------|---------------------------------------------------------------------------------------------------------------------------------------------------------------------------------------------------|--------------------------------------------------|
| DEG27     | AT3G15450 | √    | -1.16 | 0.45 | - | GO:0016020//membrane;GO:0044444//cytoplasmic part;GO:0043231//intracellular membrane-bounded organelle;GO:0016020//membrane ;GO:0044444//cytoplasmic part;GO:0043231//intracellular membrane-bounded organelle;GO:0016020//membrane ;GO:0044444//cytoplasmic part;GO:0043231//intracellular membrane-bounded organelle | -                                                                | -                                                                                          | aluminum induced protein with YGL and LRDR motif                                                                                                                                                  | Aluminum induced protein with YGL and LRDR motif |
|           |           |      |       |      |   | K02919 1 1e-07 53.1 gm x:3989331 large subunit ribosomal protein L36                                                                                                                                                                                                                                                   | GO:0009536//plastid                                              | GO:0005198//structural molecule activity                                                   | GO:0010467//gene expression                                                                                                                                                                       | ribosomal protein L36                            |
|           |           |      |       |      |   | K15283 1 0.0 705 ath:AT1G61800 solute carrier family 35, member E1                                                                                                                                                                                                                                                     | GO:0031224//intrinsic to membrane;GO:0031090//organelle membrane | transporter activity;GO:0015119;GO:005342//organic acid transmembrane transporter activity | GO:0009642//response to light intensity;GO:0051707//response to other organism;GO:0009746;GO:0015712//hexose phosphate transport;GO:0015711//organic anion transport;GO:0015717//triose phosphate | glucose-6-phosphate/phosphate translocator 2     |
| ATCG00760 | 0.83      | 1.78 |       |      |   |                                                                                                                                                                                                                                                                                                                        |                                                                  |                                                                                            |                                                                                                                                                                                                   |                                                  |
| AT1G61800 | 1.27      | 2.41 |       |      |   |                                                                                                                                                                                                                                                                                                                        |                                                                  |                                                                                            |                                                                                                                                                                                                   |                                                  |

|       |           |      |      |                                                                                                                                                                                                                                              |                     |                                                                                                          |                                          |                                                                                 |                                  |                                      |
|-------|-----------|------|------|----------------------------------------------------------------------------------------------------------------------------------------------------------------------------------------------------------------------------------------------|---------------------|----------------------------------------------------------------------------------------------------------|------------------------------------------|---------------------------------------------------------------------------------|----------------------------------|--------------------------------------|
|       |           |      |      |                                                                                                                                                                                                                                              |                     |                                                                                                          |                                          | transport;GO:0019953//sexual reproduction;GO:0034285;GO:0015979//photosynthesis |                                  |                                      |
| DEG12 | AT3G49580 | 1.38 | 2.60 | -                                                                                                                                                                                                                                            | -                   | -                                                                                                        | -                                        | -                                                                               | response to low sulfur 1 protein |                                      |
| DEG9  | AT5G23010 | 1.02 | 2.03 | K15741 1 0.0 967 ath:AT5G23010 methylthioalkylmalate synthase 1 [EC:2.3.3.-];K15742 3 0.0 757 ath:AT5G23020 methylthioalkylmalate synthase 3 [EC:2.3.3.-];K01649 5 3e-154 543 aly:ARALYDRAFT_472070 2-isopropylmalate synthase [EC:2.3.3.13] | GO:0009536//plastid | GO:0046912//transferase activity, transferring acyl groups, acyl groups converted into alkyl on transfer | GO:0043436;GO:0019758                    | methylthioalkylmalate synthase 1                                                |                                  |                                      |
| DEG11 | AT1G14960 | √    | 1.40 | 2.64                                                                                                                                                                                                                                         | -                   | GO:0044444//cytoplasmic part                                                                             | GO:0046914//transition metal ion binding | GO:0006950//response to stress;GO:0003006//developmental process involved in    | major latex-related protein      | Response to biotic stimulus, defense |

|       |           |       |      |                                                                                                                    |                                                                                                           | reproduction;GO:0010038//resp                                                                                                                                                                   | response                                                                                                                                        |                                  |
|-------|-----------|-------|------|--------------------------------------------------------------------------------------------------------------------|-----------------------------------------------------------------------------------------------------------|-------------------------------------------------------------------------------------------------------------------------------------------------------------------------------------------------|-------------------------------------------------------------------------------------------------------------------------------------------------|----------------------------------|
|       |           |       |      |                                                                                                                    |                                                                                                           | onse to metal ion                                                                                                                                                                               |                                                                                                                                                 |                                  |
| DEG17 | AT5G23020 | 1.26  | 2.40 | K15742 1 0.0 966 ath:AT5G23020 methylthioalkylmalate synthase 3<br>[EC:2.3.3.-];K15741 3 0.0 761 ath:AT5G23010 met | GO:0009536//plastid                                                                                       | GO:0046912//transferase activity, transferring acyl groups, acyl groups converted into alkyl on transfer                                                                                        | GO:0019758;GO:0006551//leucine metabolic process                                                                                                | methylthioalkylmalate synthase 3 |
|       | AT2G41240 | -0.90 | 0.54 | K13422 1 3e-08 57.0 pop:POPTR_676550 transcription factor MYC2                                                     | GO:0043231//intracellular membrane-bounded organelle;GO:0043231//intracellular membrane-bounded organelle | GO:0003676//nucleic acid binding;GO:0001071//nucleic acid binding transcription factor activity;GO:0003676//nucleic acid binding;GO:0001071//nucleic acid binding transcription factor activity | GO:0006351//transcription, DNA-dependent;GO:0006950//response to stress;GO:0006351//transcription, DNA-dependent;GO:0006950//response to stress | transcription factor bHLH100     |

|       |           |      |      |                                                                                                                                                                                                                                   |                                                         |                                                                                                                      |                                                                                                                               |                                                   |                                                        |
|-------|-----------|------|------|-----------------------------------------------------------------------------------------------------------------------------------------------------------------------------------------------------------------------------------|---------------------------------------------------------|----------------------------------------------------------------------------------------------------------------------|-------------------------------------------------------------------------------------------------------------------------------|---------------------------------------------------|--------------------------------------------------------|
| DEG15 | AT3G02020 | 1.31 | 2.47 | K00928 1 0.0 1087 ath:A<br>T3G02020 aspartate<br>kinase [EC:2.7.2.4]                                                                                                                                                              | -                                                       | GO:0031406//carboxylic<br>acid<br>binding;GO:0016774//phos<br>photransferase activity,<br>carboxyl group as acceptor | GO:0008652//cellular amino<br>acid biosynthetic<br>process;GO:0006796//phosphat<br>e-containing compound<br>metabolic process | aspartokinase 3                                   |                                                        |
|       | AT3G53040 | 1.60 | 3.04 | -                                                                                                                                                                                                                                 | -                                                       | -                                                                                                                    | -                                                                                                                             | late<br>embryogenesis<br>abundant<br>protein-like |                                                        |
| DEG20 | AT2G43535 | 1.48 | 2.79 | -                                                                                                                                                                                                                                 | GO:0044464//cell part                                   | GO:0016248//channel<br>inhibitor<br>activity;GO:0004866//endop<br>eptidase inhibitor activity                        | GO:0001906//cell<br>killing;GO:0006952//defense<br>response                                                                   | defensin-like<br>protein 196                      | Encodes a<br>defensin-like<br>(DEFL) family<br>protein |
| DEG16 | AT4G13860 | 1.33 | 2.51 | K02965 1 7e-16 80.1 ath:<br>AT5G47320 small<br>subunit ribosomal protein<br>S19;K13195 2 1e-15 79.<br>7 pop:POPTR_712972 c<br>old-inducible<br>RNA-binding<br>protein;K13095 3 8e-15 7<br>6.6 zma:100383202 splici<br>ng factor 1 | GO:0043231//intracellular<br>membrane-bounded organelle | GO:0046914//transition<br>metal ion<br>binding;GO:0043566//struct<br>ure-specific DNA<br>binding;GO:0032559          | GO:0032501//multicellular<br>organismal<br>process;GO:0006950//response<br>to stress                                          | RNA recognition<br>motif-containing<br>protein    |                                                        |
